# Supplementary material for: The stability and reaction mechanism of a LiF/electrolyte interface: insight from density functional theory
Source: Royal Society of Chemistry journal article supplement (doi:10.1039/c9ta10170e), 2019-12-24
Supplement: c9ta10170e1.pdf [file c9ta10170e1.pdf]

## Supporting Information for

# The Stability and Reaction Mechanism of LiF/Electrolyte Interface: Insight from Density Functional Theory

Bingkai Zhang,<sup>a, b</sup> Zhan Lin,<sup>\*a</sup> Haibiao Chen,<sup>b</sup> Lin-Wang Wang,<sup>\*, c</sup> and Feng Pan<sup>\*, b</sup>

<sup>a</sup>School of Chemical Engineering and Light Industry, Guangdong University of Technology, Guangzhou 510006, China

<sup>b</sup>School of Advanced Materials, Peking University, Shenzhen, China.

<sup>c</sup>Materials Sciences Division, Lawrence Berkeley National Laboratory, Berkeley, CA 94720, United States.

**\*Corresponding author: [panfeng@pkusz.edu.cn](mailto:panfeng@pkusz.edu.cn); [lwwang@lbl.gov](mailto:lwwang@lbl.gov)**

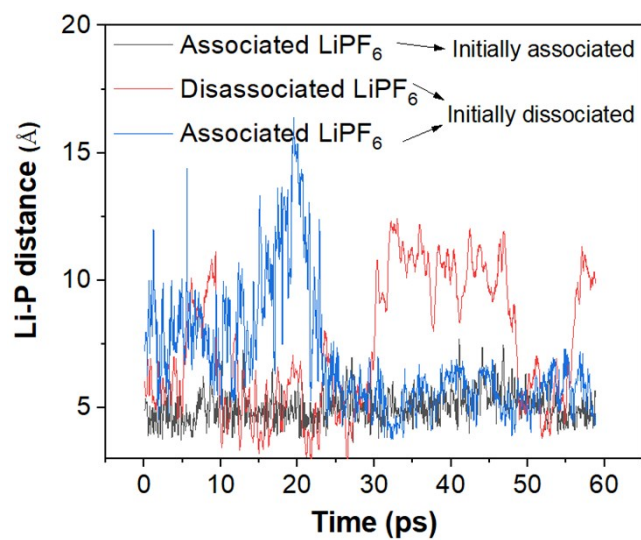

**Figure S1.** Li–P distance as a function of time for trajectories that are initially dissociated or associated. The simulation system consisted of 20 EC molecules, 20 DMC molecules, and 8 LiPF<sub>6</sub> with a density of 1.21 g/cc and a concentration of 1.0 M. After a 60 ps NVT simulation (T = 400 K), two in eight LiPF<sub>6</sub> are dissociated.

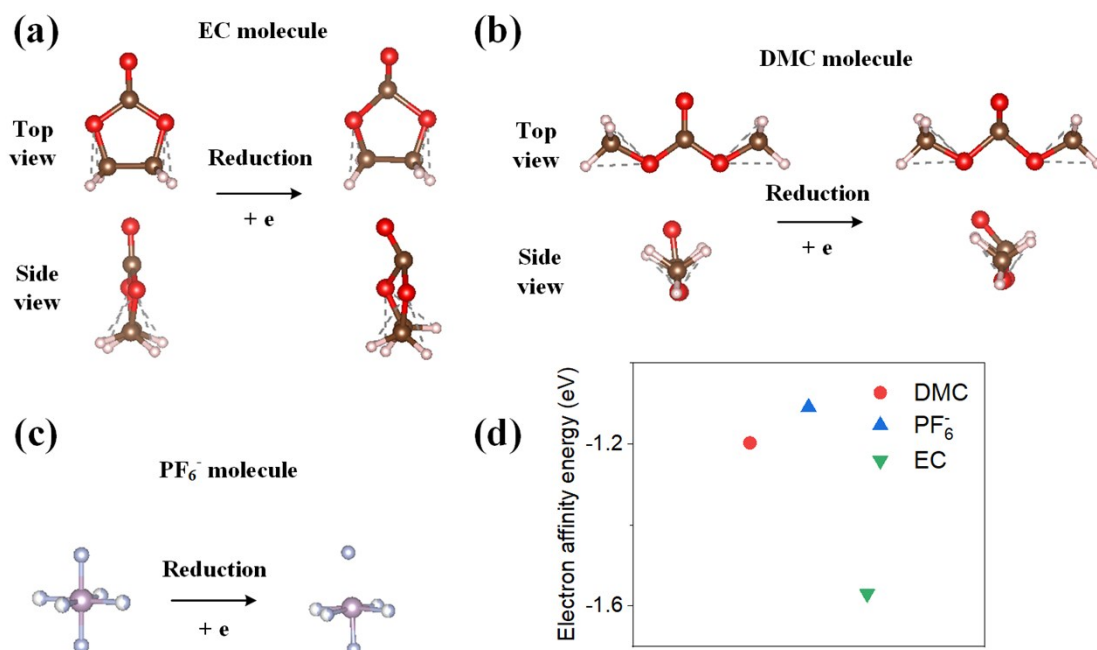

**Figure S2.** Optimized structure of EC, DMC and PF<sub>6</sub><sup>-</sup>, before and after reduction, together with the calculated electron affinity energies.

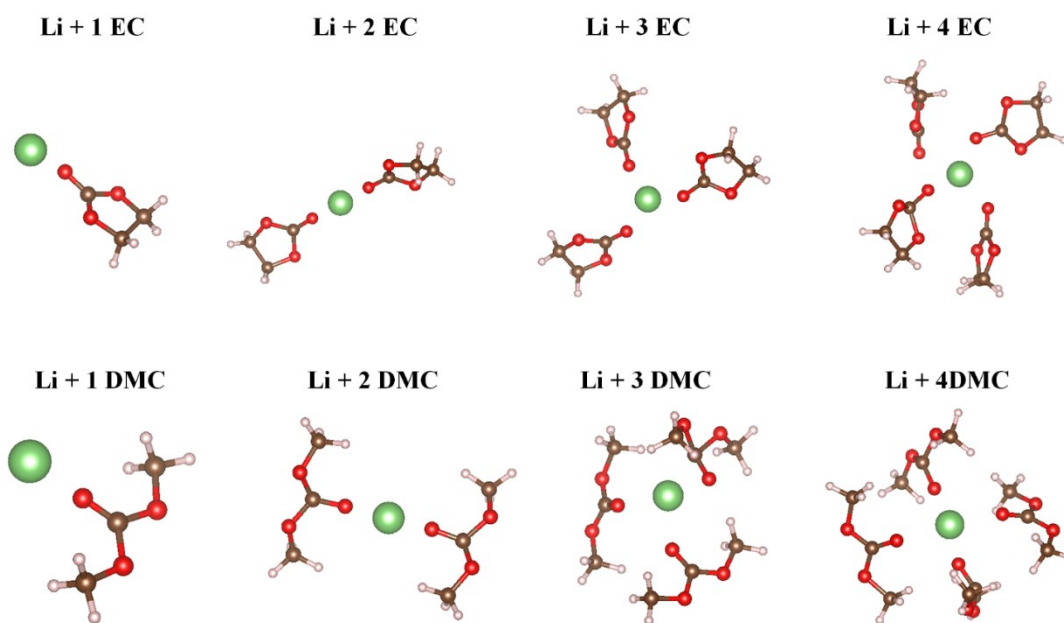

**Figure S3.** Optimized structures of (Li<sup>+</sup> : n solvent) solvation shell.

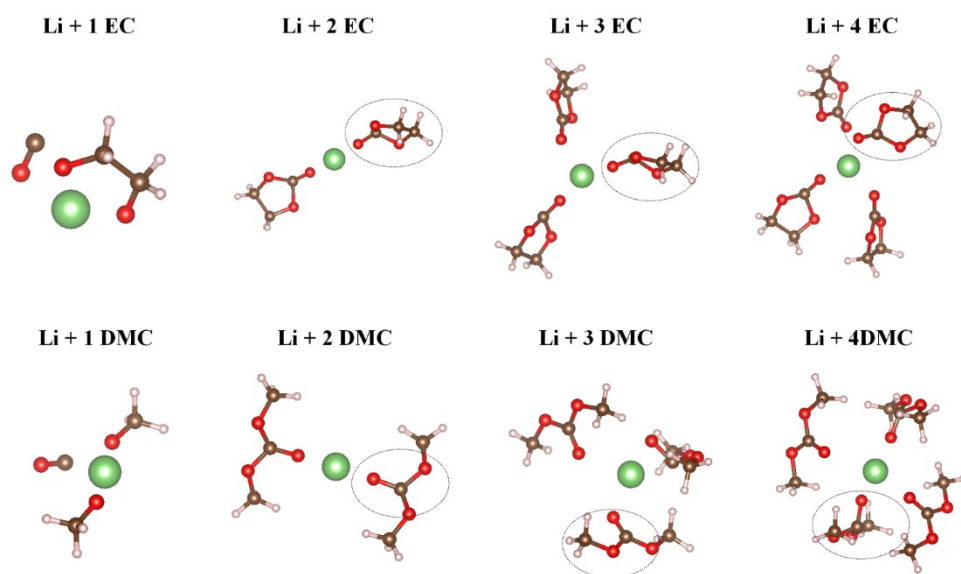

**Figure S4.** Optimized structures of ( $\text{Li}^+:\text{n}$  solvent) solvation shells after one electron reduction reaction. The gained electron is mainly distributed on the solvent highlighted with dotted circle.

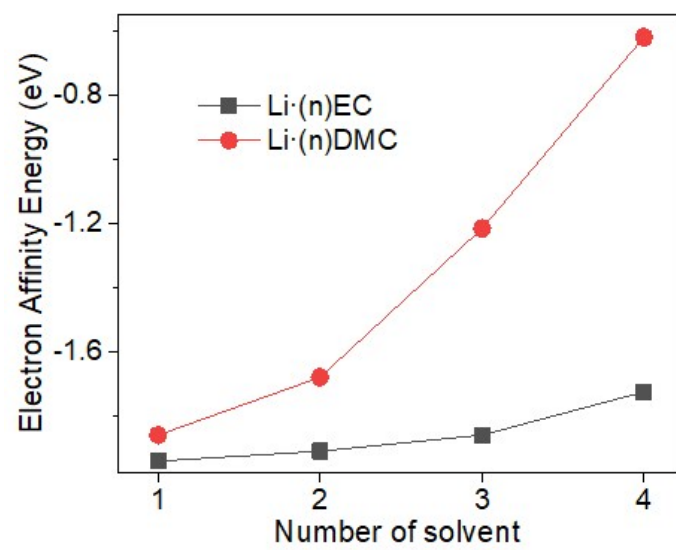

**Figure S5.** Calculated electron affinity energy of ( $\text{Li}^+:\text{n}$  solvent) ( $n = 1\sim 4$ ) solvation.

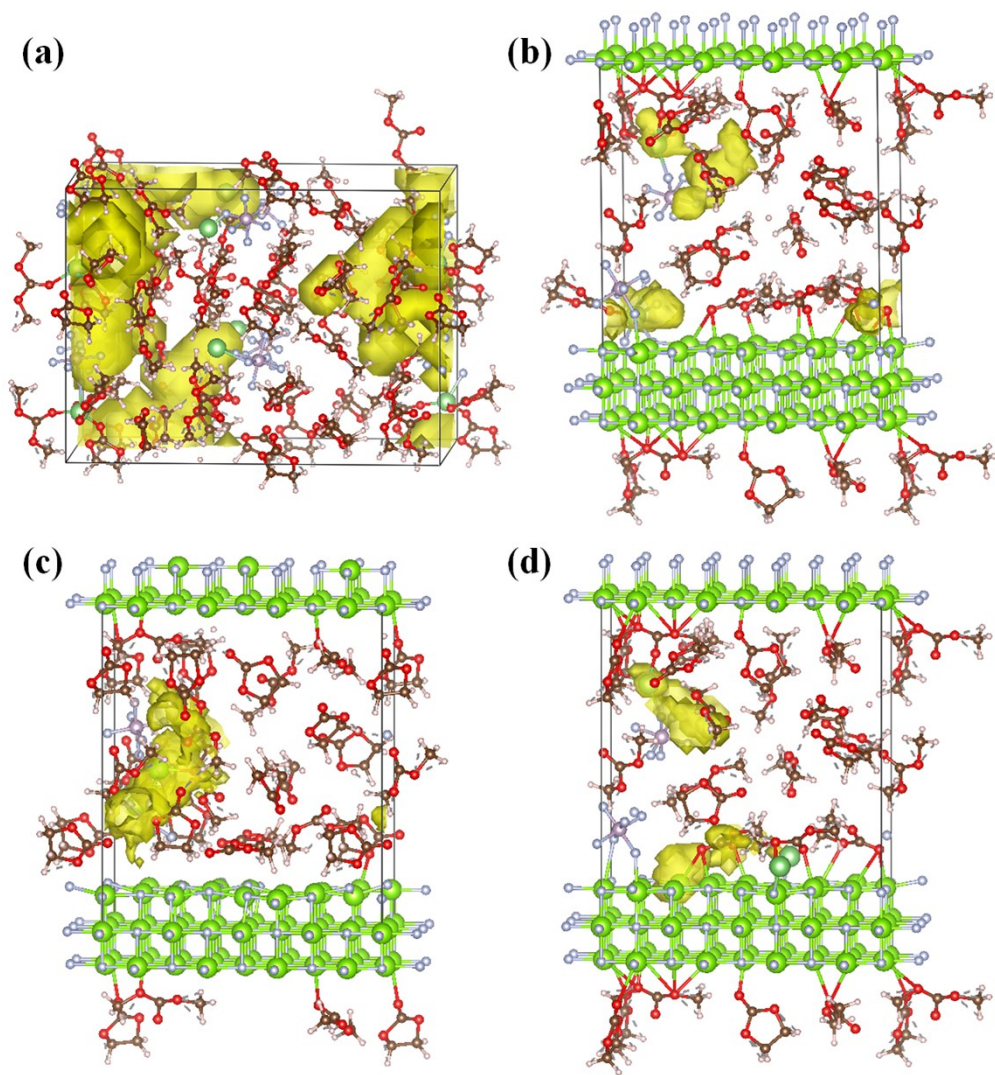

**Figure S6.** Side view of Li-ion trajectory density ( $1 \times 10^{-3} \text{ \AA}^{-3}$  isosurface level) obtained by NVT AIMD simulation at 500 K. (a) LE, (b-d) three kinds of different LiF/LE interfaces.

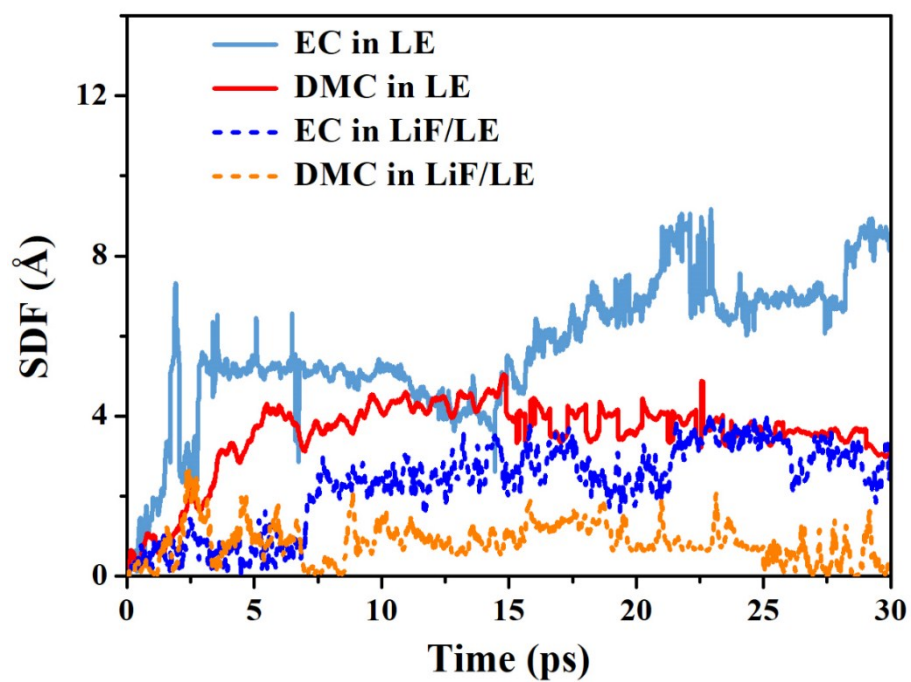

**Figure S7.** The site displacement function (SDF) for EC and DMC motion (by tracking C atoms) from NVT AIMD simulation at 800 K in LE (solid lines) and LiF/LE interface (dash lines).
